# Supplementary material
Source: PubMed Central journal article supplement (PMC140081)
Supplement: nar_30_24_5517__1.pdf [file nar_30_24_5517__1.pdf]

## SUPPLEMENTARY MATERIAL

### COMPARISON OF METHODS FOR THE DEFINITION OF THE COMK-REGULON

In the analysis of the macroarrays the question arises how the ComK-regulon is best defined, *i.e.* which genes can be considered to be significantly activated by ComK and which genes are not influenced by this regulator. A comparison of the transcription profiles of the *comK* knockout strain (BV2004) and the control strain (BV2012) revealed 94 genes with a greater than 2-fold difference in expression level. As shown in the first bar diagram of Fig. 1, almost all of the known ComK-activated genes (summarized in Table 1) were up-regulated more than 2-fold. Three genes known to be ComK regulated were missing from this list: *addA*, *addB*, and *uvrB* did not meet the criterium. It is noteworthy that these genes are also missing in two other recently published papers on the ComK-regulon (1;2). Generally, a 2-fold difference is assumed to be significant in DNA-array experiments. Arfin et al., however, convincingly showed that the criterion of a 2-fold difference in expression levels is disputable (3). They used a statistical approach to discriminate between regulated and non-regulated genes and showed that a 1.5-fold difference in expression can be significant, whereas in several cases differences of more than 2-fold appeared to be unreliable. A major difficulty with applying statistical analyses on array data is the small number of replicates, which results in poor estimates of variance and a correspondingly poor performance of a *t* test, as illustrated in Fig. 2 B. Long et al. developed a statistical program, Cyber-T, incorporating a Bayesian prior to improve the *t* test for DNA-array measurements (4). They assumed that genes with similar expression levels have similar measurement errors, and that a set of such genes can be used as pseudo-replicates to increase the reliability of the variance (for a comprehensive discussion see (5)). As shown in Fig. 1 C, when Cyber-T was used to analyze the data set, the majority of known ComK-activated genes clustered at the high-reliability end of the bar diagram, comparable to the clustering seen when genes were sorted on fold differences in expression (Fig. 1 A). The last bar diagram of Fig. 1 gives an indication of the correlation between expression differences and p-values measured by Cyber-T. Cyber-T thus provides us with a statistical method to select ComK activated genes, which performs at least as well as a selection based on expression differences.

**Figure S1.** Genes differently expressed between wild type and *comK* mutant strain, and sorted on fold differences in expression, or sorted on significance of differences in expression (p-values). Bar diagrams display the first 100 genes after sorting. Closed bars indicate known ComK-activated genes. A) Genes sorted on fold differences in expression, B) genes sorted on p-values calculated by a Student *t* test, C) genes sorted on p-values calculated by Cyber-T, D) sorted as C, but displaying the fold differences in expression.

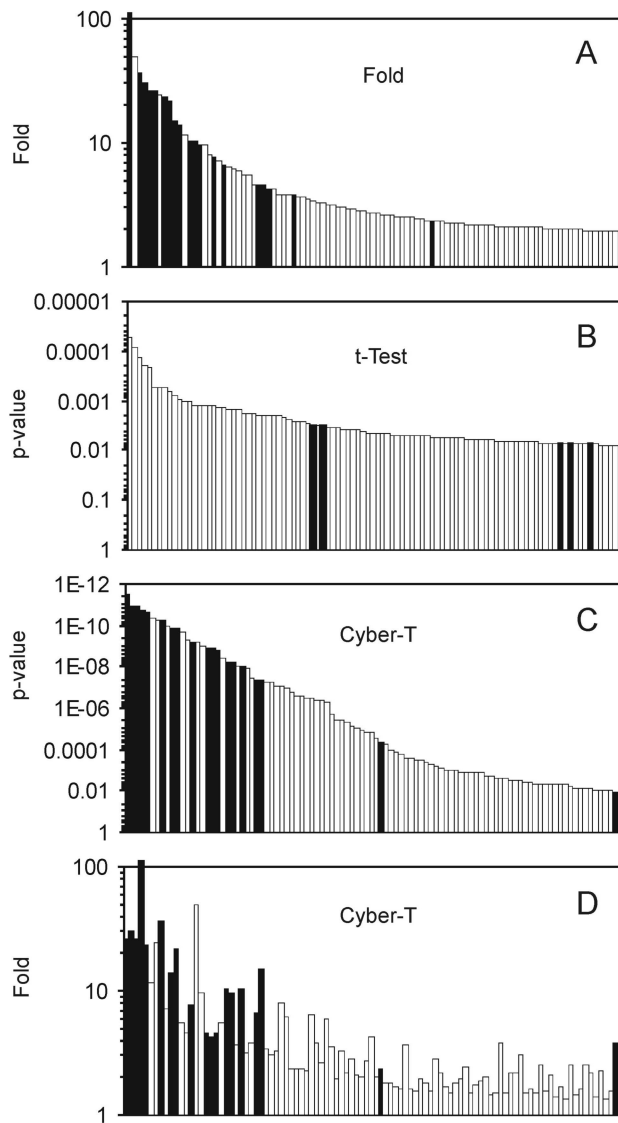

## Reference List

1. Berka, R.M., Hahn, J., Albano, M., Draskovic, I., Persuh, M., Cui, X., Sloma, A., Widner, W. and Dubnau, D. (2002) Microarray analysis of the Bacillus subtilis K-state: genome-wide expression changes dependent on ComK. *Mol. Microbiol.*, **43**, 1331-1345.
2. Ogura, M., Yamaguchi, H., Kobayashi, K., Ogasawara, N., Fujita, Y. and Tanaka, T. (2002) Whole-Genome Analysis of Genes Regulated by the Bacillus subtilis Competence Transcription Factor ComK. *J. Bacteriol.*, **184**, 2344-2351.
3. Arfin, S.M., Long, A.D., Ito, E.T., Toller, L., Riehle, M.M., Paegle, E.S. and Hatfield, G.W. (2000) Global gene expression profiling in Escherichia coli K12. The effects of integration host factor. *J. Biol. Chem.*, **275**, 29672-29684.
4. Long, A.D., Mangalam, H.J., Chan, B.Y., Toller, L., Hatfield, G.W. and Baldi, P. (2001) Improved statistical inference from DNA microarray data using analysis of variance and a Bayesian statistical framework. Analysis of global gene expression in Escherichia coli K12. *J. Biol. Chem.*, **276**, 19937-19944.
5. Baldi, P. and Long, A.D. (2001) A Bayesian framework for the analysis of microarray expression data: regularized t -test and statistical inferences of gene changes. *Bioinformatics.*, **17**, 509-519.

## EFFECT OF AN ANTIBIOTIC RESISTANCE MARKER ON TRANSCRIPTION PROFILES

Experiments were carried out with RNA isolated from wild type cells and from cells mutated in *comK*. For convenience, *comK* was mutated by insertion of a spectinomycin resistance marker. So in fact this strain contains two genetic modifications; a disrupted *comK* gene and the presence of an antibiotic resistance gene. In order to detect genuine ComK-dependent expression, we examined to which extent the presence of a spectinomycin resistance marker alters the global *B. subtilis* transcription profile. A *B. subtilis* strain was constructed in which the spectinomycin marker was inserted at a suitable place in the genome, such that the expression of no gene nor operon was affected. We chose the *pks* locus for integration. The *pks* operon is one of the largest operons in *B. subtilis* and encodes components of a polyketide synthetase implicated in synthesis of the antibiotic difficidin (1). Mutations in this locus showed no phenotype and so far production of difficidin by *B. subtilis* strain 168 has not been reported (2). The spectinomycin marker was integrated between the 3'-end of the last gene (*pksS*) and the terminator of the operon, and had the same transcription direction. The adjacent *pksR* gene is transcribed in the opposite direction.

Both the wild-type strain (8G5) and the strain containing the spectinomycin marker at the *pks* locus (BV2012) were grown in competence medium (without spectinomycin) according to a two-step competence protocol and cells were harvested when the competence stage was reached. The experimental set-up was the same as for the determination of the ComK-regulon (see Materials and Methods of the original article for details). 16 genes showed more than 2 fold difference in expression due to the presence of a spectinomycin marker. We used Cyber-T to calculate the significance of our array-data and Table 1 presents a summary of genes with > 1.5 fold difference in expression, due to the presence of a spectinomycin marker, and p-value < 0.05 (see for an extensive discussion on folds versus p-values Long et al. (3)). Only 15 genes met our selection criteria of which 3 genes showed a difference in expression of more than 2 fold. The lower expression of *pksR* is likely to be related to read through from the adjacent spectinomycin resistance gene. Clearly, the presence of the spectinomycin resistance gene has only a marginal effect on the global transcription pattern, and it is unlikely that this marker will obscure the global transcription effect of a mutated *comK*. However, since at least some effects were observed, we decided to use strain BV2012 as reference "wild-type" strain in the global transcription profiling of a *comK* mutant.

**Table S1.** Effect of a spectinomycin resistance marker (Spc) on global gene expression in *B. subtilis*. The transcription profile of a wild type strain (wt) was compared to the transcription profiles of (i) strain BV2012 containing a Spc marker at the *pks* locus (Spc), and (ii) strain BV2004 containing a Spc marker inserted into *comK* (comK-Spc). Only genes with p-values < 0.016 are displayed (see main text for details). p-Values were determined using Cyber-T. Positive fold differences indicate increased gene expression due to the presence of the Spc marker. Negative fold differences indicate decreased gene expression due to the presence of the Spc marker.

| Gene        | Fold Spc / wt | Fold comK-Spc / wt | Description                                                           |
|-------------|---------------|--------------------|-----------------------------------------------------------------------|
| <i>carA</i> | 3.42          | 5.02               | Carbamoyl-phosphate transferase-arginine (subunit A)                  |
| <i>tnrA</i> | 2.07          | 1.85               | Transcriptional pleiotropic regulator involved in nitrogen regulation |
| <i>ybbM</i> | 1.88          | 1.97               | Similar to hypothetical proteins                                      |
| <i>yclP</i> | 1.64          | 1.78               | Similar to ferrichrome ABC transporter (ATP-binding protein)          |
| <i>yfmT</i> | 1.54          | 1.73               | Similar to benzaldehyde dehydrogenase                                 |
| <i>yczI</i> | 1.52          | 1.63               | No similarity to other proteins                                       |
| <i>pksR</i> | -1.91         | -                  | Polyketide synthase                                                   |

## Reference List

1. Kunst,F., Ogasawara,N., Moszer,I., Albertini,A.M., Alloni,G., Azevedo,V., Bertero,M.G., Bessieres,P., Bolotin,A., Borchert,S. *et al.* (1997) The complete genome sequence of the gram-positive bacterium *Bacillus subtilis*. *Nature*, **390**, 249-256.
2. Scotti,C., Piatti,M., Cuzzoni,A., Perani,P., Tognoni,A., Grandi,G., Galizzi,A. and Albertini,A.M. (1993) A *Bacillus subtilis* large ORF coding for a polypeptide highly similar to polyketide synthases. *Gene*, **130**, 65-71.
3. Long,A.D., Mangalam,H.J., Chan,B.Y., Toller,L., Hatfield,G.W. and Baldi,P. (2001) Improved statistical inference from DNA microarray data using analysis of variance and a Bayesian statistical framework. Analysis of global gene expression in *Escherichia coli* K12. *J.Biol.Chem.*, **276**, 19937-19944.

## IDENTIFICATION OF REPRESSED GENES

Both the wild-type strain (8G5) and the strain containing the spectinomycin marker at the *pks* locus (BV2012) were grown in competence medium (without spectinomycin) according to a two-step competence protocol and cells were harvested when the competence stage was reached. The experimental set-up was the same as for the determination of the ComK-regulon (see Materials and Methods of the original article for details).

In our study we found 6 genes (Table 1), which were repressed significantly when the *flgM* standards were applied after analysis with Cyber-T (1). The repression of one of those genes, *pksR*, is presumably a polar effect of the insertion of the Spc marker adjacent to *pksR* in the control strain BV2012. The differences in expression of the other five genes are low. Whether these marginal differences originate from the competent or non-competent cell fraction, or whether they are relevant for competence development, is unknown. According to experiments done in the BSFA consortium, at least one of the genes (*ylqD*) is not required for competence.

**Table S2.** Genes repressed by ComK. The expression of the selected genes showed at least 1.4-fold differences with p-values < 0.017. Genes are sorted according to expression differences. The functional descriptions are based on the Subtilist Web Server (<http://genolist.pasteur.fr/Subtilist/>) information. The distance to the first upstream K-box is given in base pairs, together with type and bp match of the K-box.

| Gene        | Description                              | Fold | Involved in competence | Distance to K-box | K-box type |
|-------------|------------------------------------------|------|------------------------|-------------------|------------|
| <i>pksR</i> | Polyketide synthase                      | -1.7 |                        |                   |            |
| <i>ylqD</i> | Similar to hypothetical proteins         | -1.6 | no (1)                 | 622               | II-13      |
| <i>ykaA</i> | No similarity to other proteins          | -1.5 |                        | 169               | II-13      |
| <i>thiF</i> | Thiamine biosynthesis                    | -1.4 |                        | 2769              | II-13      |
| <i>rapF</i> | Response regulator aspartate phosphatase | -1.4 |                        | 9733              | III-13     |
| <i>prs</i>  | Phosphoribosyl pyrophosphate synthetase  | -1.4 |                        | 9021              | II-13      |

(1) BSFA, *Bacillus subtilis* functional analyses programme. Transformation percentages < 10% were considered as disturbed competence.

## Reference List

1. Long, A.D., Mangalam, H.J., Chan, B.Y., Toller, L., Hatfield, G.W. and Baldi, P. (2001) Improved statistical inference from DNA microarray data using analysis of variance and a Bayesian statistical framework. Analysis of global gene expression in *Escherichia coli* K12. *J. Biol. Chem.*, **276**, 19937-19944.
